# Supplementary material
Source: publisher figshare collection journal article supplement (https://acs.figshare.com/ndownloader/files/6985784)
Supplement: Supplementary file 1 [file 6985784]

## SUPPLEMENTARY MATERIAL

### Signatures of phonon and defect-assisted tunneling in planar metal-hexagonal boron nitride-graphene junctions

U. Chandni,<sup>1,\*</sup> K. Watanabe,<sup>2</sup> T. Taniguchi,<sup>2</sup> and J. P. Eisenstein<sup>1</sup>

<sup>1</sup>*Institute for Quantum Information and Matter,  
Department of Physics, California Institute of Technology,  
1200 E. California Blvd., Pasadena, California 91125, USA*

<sup>2</sup>*National Institute for Materials Science, 1-1 Namiki Tsukuba, Ibaraki 305-0044, Japan*

#### A. S1. Role of metal Fermi surfaces in momentum conserved tunneling

In-plane momentum is treated as a conserved quantity in the tunneling processes described in the main text. Here we discuss the silver and chromium Fermi surfaces (FS) and their contributions to the tunnel current. For simple metals, the FS can be treated as a sphere, which works reasonably well for the polycrystalline Ag tunnel electrodes. Fig.S1a shows a top view of the Brillouin zone (BZ) of graphene, where the tiny red circles at the corner  $K$  and  $K'$ -points indicate the FS for a nominal density of  $5 \times 10^{12} \text{cm}^{-2}$ . The  $\Gamma - K$  distance for graphene is  $1.70 \times 10^{10} \text{m}^{-1}$ . The FS of Ag is shown as a sphere centered at the  $\Gamma$ -point ( $k_{F,Ag} \approx 1.2 \times 10^{10} \text{m}^{-1}$ )<sup>1</sup>. At low temperatures, the electrons that contribute to the tunnel current lie close to the Fermi surfaces of the metal and the graphene. Under normal circumstances, we observe that the Fermi surfaces have no overlap in momentum and hence elastic tunneling from the metal to the graphene layer is prohibited. Hence, only phonons or defect states in the heterostructure can contribute to inelastic tunneling processes, which are discussed in the following section.

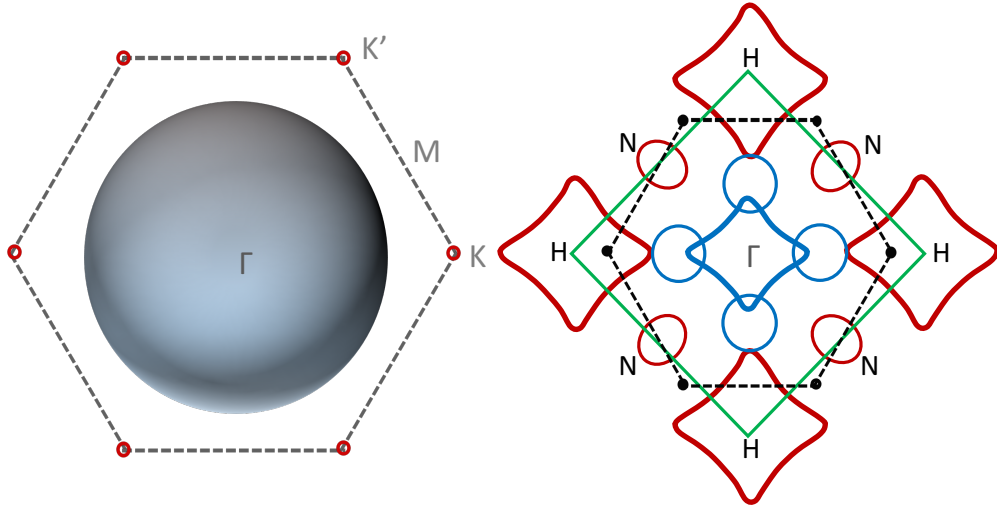

Fig S 1 – (a) Top-view of the heterostructure elements as seen in the momentum space. The circles at the  $K/K'$  points are the Fermi surfaces of graphene for a density of  $n = 5 \times 10^{12} \text{cm}^{-2}$ . The nearly spherical metal Fermi surface is centered at the  $\Gamma$ - point. (b) Chromium Fermi surface cross section in the (100) plane<sup>2</sup>. The green square is the first BZ. The electron and hole octahedra are denoted by blue and red lines respectively. The black dashed line shows the graphene BZ and the tiny black dots indicate the graphene FS at the  $K$  and  $K'$ -points. In this orientation a  $K$  and a  $K'$  point overlap the Cr FS. Note that this is just one amongst the many orientations that are possible with a polycrystalline Cr top electrode.



Interestingly, the above picture suggests that a relative orientation between the graphene and hBN layers will be inconsequential to the observed phonon modes as long as there are enough electrons in the Fermi surface that have corresponding  $z$ -momenta. The first peak in  $d^2I/dV^2$  at  $A=36$  meV can be attributed to the flat band in hBN in the  $M-K$  direction arising from the ZA mode<sup>4</sup>. We observe that the contributions to the two strongest peaks (at  $B=61$  meV and  $C=74$  meV respectively) come mainly from the ZA and ZO modes of the graphene and hBN<sup>3,4</sup>. This is in agreement with previous observations that the coupling of the out of plane modes to the graphene wavefunctions aid tunneling significantly<sup>6</sup>. More specifically, hBN has a flat band around  $\sim 75$  meV in the  $M-K$  direction arising from its ZO mode<sup>4</sup>. Graphene has a flat band at the  $M$ -point arising from the ZA mode, a crossing at the  $K$ -point arising from its ZA/ZO modes at  $\sim 65$  meV and a ZA/ZO/TA band crossing at the  $M$ -point at  $\sim 80$  meV<sup>3</sup>. Around the range  $\sim 150 - 170$  meV, both hBN and graphene have many flat bands and crossings from LO and TO modes, which possibly lead to the broad peak that we observe at  $D=166$  meV.

---

\* [chandniu@gmail.com](mailto:chandniu@gmail.com)

<sup>1</sup> N. W. Ashcroft and N. D. Mermin, Solid State Physics, Holt-Saunders (1976).

<sup>2</sup> Fawcett, E. *Rev. Mod. Phys.* **1988**, 60, 209-283.

<sup>3</sup> Yan, J.-A.; Ruan W. Y.; Chou, M. Y. *Phys. Rev. B.* **2008**, 77, 125401.

<sup>4</sup> Serrano, J.; Bosak, A.; Arenal, R.; Krisch, M.; Watanabe, K.; Taniguchi, T.; Kanda, H.; Rubio, A.; Wirtz, L. *Phys. Rev. Lett.* **2007**, 98, 095503.

<sup>5</sup> Mohr, M.; Maultzsch, J.; Dobardi, E.; Reich, S.; Milojevi, I.; Damnjanovi, M.; Bosak, A.; Krisch, M.; Thomsen, C. *Phys. Rev. B.* **2007**, 76, 035439.

<sup>6</sup> Zhang, Y.; Brar, V. W.; Wang, F.; Girit, C.; Yayon, Y.; Panlasigui, M.; Zettl, A.; Crommie, M. F. *Nature Phys.* **2008**, 4, 627-630.
